# Supplementary material
Source: PubMed Central journal article supplement (PMC10992615)

# Supplementary Fig. 1

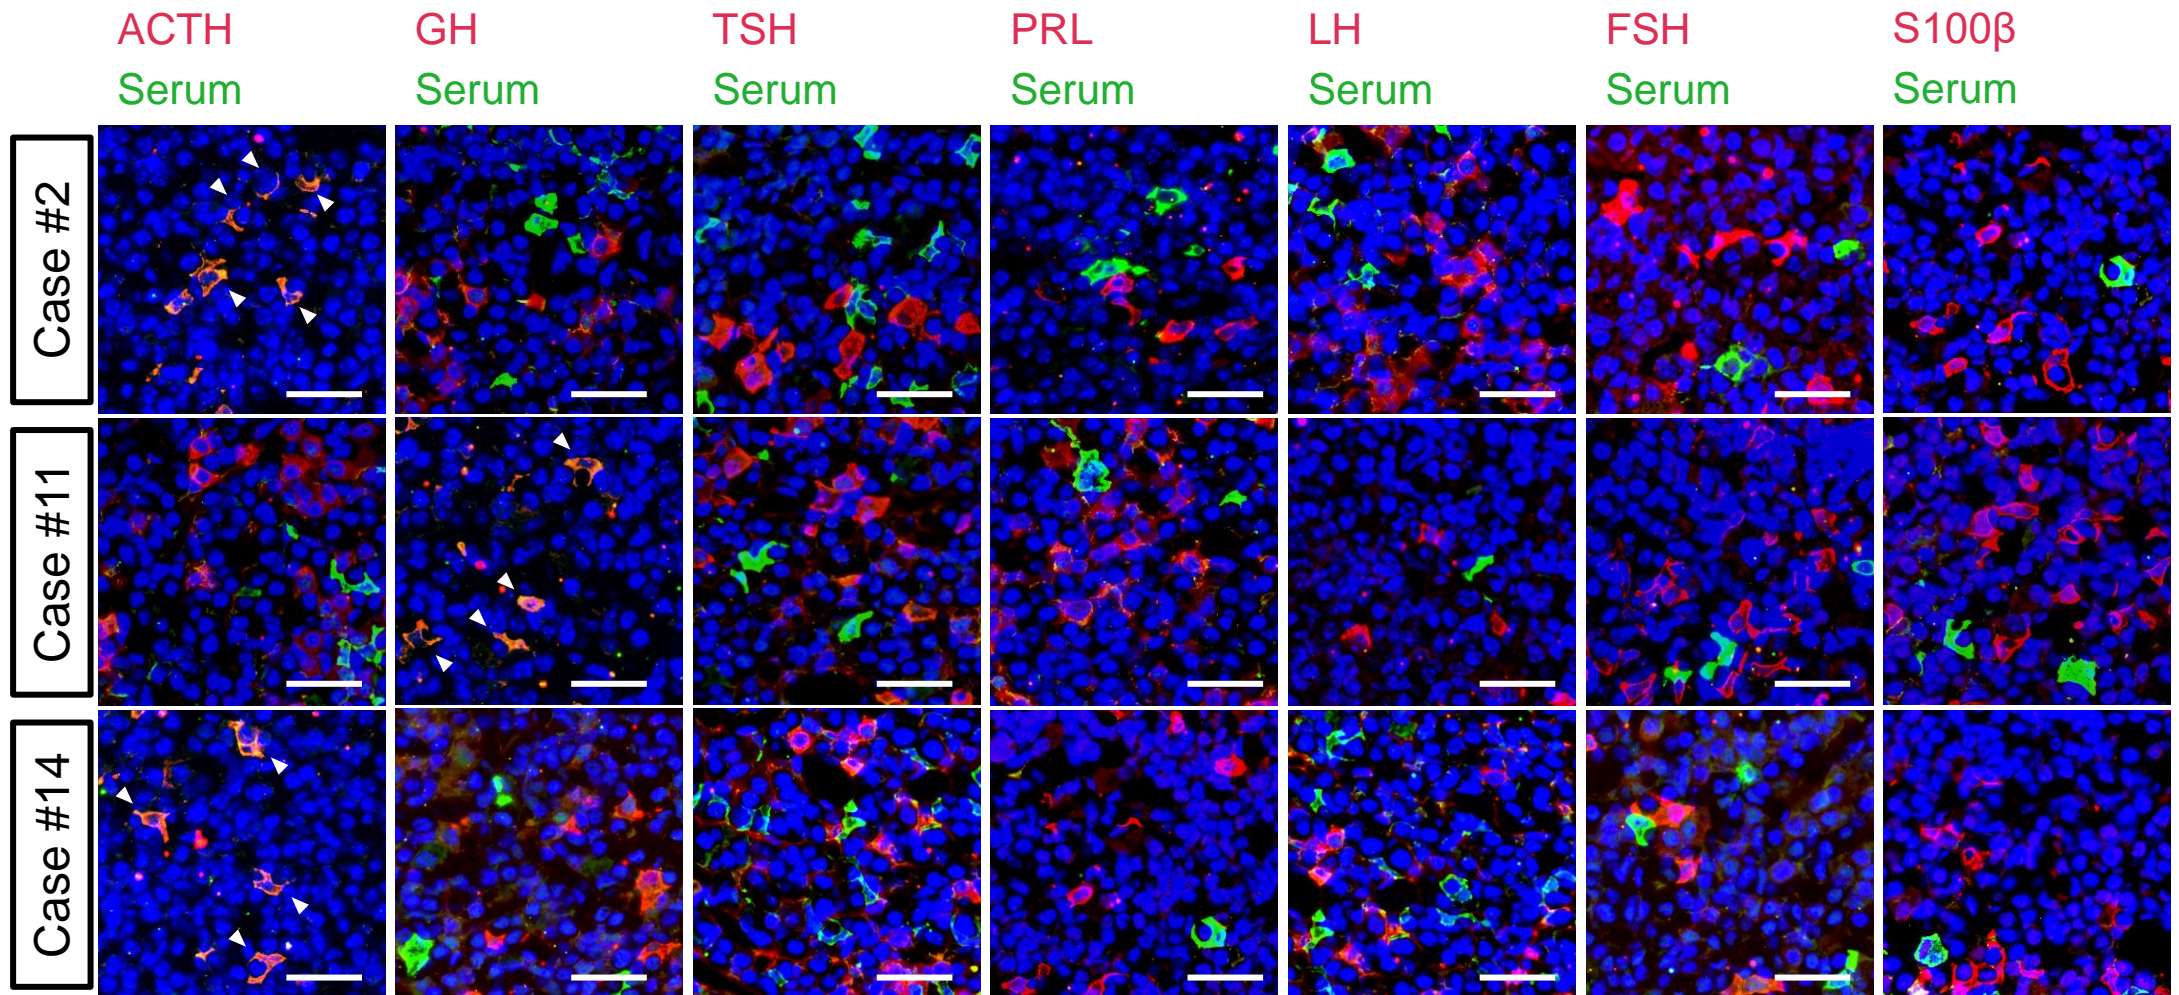

Supplement: 262_2021_2955_MOESM1_ESM.pdf [file 262_2021_2955_MOESM1_ESM.pdf]
